# Supplementary material for: Optimization of a series of dipeptides with a P3 β-neopentyl asparagine residue as non-covalent inhibitors of the chymotrypsin-like activity of human 20S proteasome
Source: Royal Society of Chemistry journal article supplement (doi:10.1039/c2md20060k), 2012-01-01
Supplement: c2md20060k.pdf [file c2md20060k.pdf]

Supplementary Material for “Optimization of a Series of Dipeptides with a P3 - Neopentyl asparagine residue as potent non-covalent Inhibitors of the Chymotrypsin-like activity of the Human 20S Proteasome”

Christopher Blackburn,\* Cynthia Barrett, Jonathan L. Blank, Frank J. Bruzzese, Nancy Bump, Lawrence R. Dick, Paul Fleming, Khristofer Garcia, Paul Hales, Matthew Jones, Jane X. Liu, Masayuki Nagayoshi, Darshan S. Sappal, Michael D. Sintchak, Christopher Tsu, Cindy Xia, Xiansi Zhou, Kenneth M. Gigstad

### Crystallographic data and refinement statistics

|                                                        | Compound                                     |                                  |
|--------------------------------------------------------|----------------------------------------------|----------------------------------|
|                                                        | 20                                           | 34                               |
| PDB ID                                                 | 3SDI                                         | 3SDK                             |
| Space group                                            | P2 <sub>1</sub>                              | P2 <sub>1</sub>                  |
| Unit cell dimensions (Å, °)                            | a= 136.6<br>b= 299.5<br>c= 145.5<br>β= 113.2 | 136.1<br>299.4<br>146.2<br>112.9 |
| Wavelength (Å)                                         | 0.97958                                      | 0.97958                          |
| Resolution (Å)                                         | 50 - 2.65                                    | 50 - 2.7                         |
| R <sub>sym</sub> <sup>a</sup> (%)                      | 9.9 (37.8) <sup>b</sup>                      | 8.3 (36.1)                       |
| Total observations                                     | 1097554                                      | 1044183                          |
| Unique reflections                                     | 297624                                       | 280182                           |
| Average redundancy                                     | 3.7                                          | 3.7                              |
| <I/σ>                                                  | 9.5 (1.9)                                    | 8.9 (2.5)                        |
| Completeness (%)                                       | 95.8 (78.8)                                  | 95.3 (71.6)                      |
| Refinement resolution (Å)                              | 50 – 2.65                                    | 50 - 2.7                         |
| Reflections (working/test)                             | 290919/<br>5996                              | 274063/<br>5652                  |
| R <sub>cryst</sub> /R <sub>free</sub> (%) <sup>c</sup> | 21.9/25.3                                    | 22.3/25.8                        |
| Protein atoms                                          | 48900                                        | 49137                            |
| ligand atoms                                           | 84                                           | 86                               |
| MES atoms                                              | 24                                           | 24                               |
| Mg <sup>2+</sup> atoms                                 | 20                                           | 10                               |

|                            |           |           |
|----------------------------|-----------|-----------|
| Water atoms                | 1         | 0         |
| rmsd bond lengths (Å)      | 0.010     | 0.009     |
| rmsd bond angles (°)       | 1.26      | 1.18      |
| Ramachandran analysis      |           |           |
| most-favored (%/#)         | 90.9/5038 | 90.9/5050 |
| additional allowable (%/#) | 8.6/478   | 8.4/468   |
| generously allowed (%/#)   | 0.3/16    | 0.4/21    |
| disallowed (%/#)           | 0.2/12    | 0.3/16    |

<sup>a</sup> $R_{\text{sym}} = (\sum_{\text{hkl}} \sum_i |I_i(\text{hkl}) - \langle I(\text{hkl}) \rangle|) / \sum_{\text{hkl}} \sum_i I_i(\text{hkl})$  for  $n$  independent reflections and  $i$  observations of a given reflection.  $\langle I(\text{hkl}) \rangle$  is the average intensity of the  $i^{\text{th}}$  observation.

<sup>b</sup>numbers in parenthesis are for highest resolution shell.

<sup>c</sup> $R_{\text{cryst}} = \sum_h ||F_o(\mathbf{h})| - |F_c(\mathbf{h})|| / \sum_h |F_o(\mathbf{h})|$ , where  $F_o$  and  $F_c$  are the observed and calculated structure factors, respectively.
